# Supplementary material
Source: PubMed Central journal article supplement (PMC4272717)

## **Supplemental Data Summary**

**Bacterioplankton communities respond to cadmium (Cd) exposure in coastal water microcosms with high temporal variability**

**Table S1** Two-way analysis of variance (ANOVA) for environmental variables of seawater across different sampling days and Cd levels.

| Sampling day            | Cd level | pH               | DO (mg/L)        | DOC (mg/L)       | Chl- <i>a</i> (μg/L) | PO <sub>4</sub> <sup>3-</sup> -P (μM) | NO <sub>3</sub> <sup>-</sup> -N (μM) | NH <sub>4</sub> <sup>+</sup> -N (μM) | NO <sub>2</sub> <sup>-</sup> -N (μM) |
|-------------------------|----------|------------------|------------------|------------------|----------------------|---------------------------------------|--------------------------------------|--------------------------------------|--------------------------------------|
| 0d                      | Origin   | 7.95 ±0.01       | 8.52 ±0.47       | 2.18 ±0.47       | 14.72 ±0.93          | 0.60 ±0.06                            | 28.3 ±2.2                            | 6.0 ±1.0                             | 1.36 ±0.10                           |
| 1d                      | CK       | 8.01 ±0.01       | 8.59 ±0.28       | 4.43 ±0.26       | 13.53 ±1.24          | 0.33 ±0.04                            | 26.8 ±2.5                            | 11.6 ±0.5                            | 1.42 ±0.14                           |
|                         | Cd1      | 8.01 ±0.01       | 8.34 ±0.04       | 6.85 ±2.76       | 13.02 ±0.26          | 0.38 ±0.09                            | 24.1 ±5.8                            | 11.5 ±0.3                            | 1.42 ±0.14                           |
|                         | Cd2      | 7.99 ±0.01       | 8.22 ±0.04       | 5.97 ±0.74       | 8.51 ±1.53           | 0.47 ±0.02                            | 27.4 ±5.1                            | 11.3 ±0.4                            | 1.42 ±0.17                           |
|                         | Cd3      | 8.00 ±0.01       | 8.35 ±0.07       | 5.23 ±0.46       | 8.09 ±1.16           | 0.48 ±0.03                            | 27.3 ±7.0                            | 11.0 ±0.6                            | 1.37 ±0.11                           |
| 4d                      | CK       | 8.05 ±0.02       | 7.62 ±0.03       | 6.31 ±0.33       | 1.30 ±0.08           | 0.16 ±0.04                            | 32.4 ±6.3                            | 4.1 ±1.1                             | 1.46 ±0.05                           |
|                         | Cd1      | 8.09 ±0.05       | 7.96 ±0.33       | 7.75 ±1.69       | 2.36 ±1.61           | 0.14 ±0.05                            | 33.7 ±6.0                            | 4.6 ±0.7                             | 1.53 ±0.26                           |
|                         | Cd2      | 8.03 ±0.02       | 8.29 ±0.09       | 5.02 ±0.87       | 3.03 ±0.75           | 0.40 ±0.06                            | 36.6 ±2.1                            | 11.0 ±1.4                            | 1.48 ±0.19                           |
|                         | Cd3      | 8.03 ±0.02       | 8.28 ±0.16       | 4.25 ±0.64       | 3.21 ±1.40           | 0.46 ±0.06                            | 34.9 ±2.5                            | 13.9 ±0.4                            | 1.31 ±0.11                           |
| 7d                      | CK       | 8.01 ±0.01       | 7.22 ±0.26       | 5.29 ±0.63       | 1.12 ±0.79           | 0.31 ±0.02                            | 20.9 ±2.4                            | 12.8 ±0.6                            | 1.45 ±0.22                           |
|                         | Cd1      | 8.05 ±0.01       | 7.28 ±0.17       | 4.35 ±2.02       | 0.93 ±0.26           | 0.22 ±0.04                            | 22.0 ±2.5                            | 10.6 ±2.1                            | 1.61 ±0.11                           |
|                         | Cd2      | 8.03 ±0.01       | 7.36 ±0.10       | 4.37 ±1.02       | 1.40 ±0.32           | 0.45 ±0.02                            | 20.9 ±5.1                            | 16.3 ±0.7                            | 1.55 ±0.26                           |
|                         | Cd3      | 8.03 ±0.01       | 7.28 ±0.08       | 3.78 ±0.41       | 1.12 ±0.64           | 0.41 ±0.06                            | 26.2 ±3.5                            | 17.5 ±0.3                            | 1.33 ±0.12                           |
| 14d                     | CK       | 8.21 ±0.18       | 8.11 ±0.61       | 5.67 ±0.64       | 5.02 ±2.73           | 0.16 ±0.02                            | 18.1 ±2.2                            | 2.4 ±0.4                             | 1.71 ±0.35                           |
|                         | Cd1      | 8.09 ±0.04       | 7.63 ±0.41       | 4.31 ±0.27       | 3.49 ±0.84           | 0.40 ±0.09                            | 14.2 ±2.8                            | 6.3 ±1.2                             | 1.73 ±0.11                           |
|                         | Cd2      | 8.08 ±0.01       | 7.40 ±0.06       | 3.43 ±0.12       | 1.84 ±1.04           | 0.80 ±0.07                            | 21.7 ±1.3                            | 10.8 ±0.7                            | 1.57 ±0.21                           |
|                         | Cd3      | 8.07 ±0.00       | 7.44 ±0.16       | 4.41 ±1.02       | 0.84 ±0.32           | 0.79 ±0.28                            | 21.0 ±5.0                            | 11.7 ±0.7                            | 1.46 ±0.11                           |
| <i>Time</i>             | F        | 14.69            | 62.83            | 7.123            | 234.561              | 24.49                                 | 39.70                                | 5.938                                | 3.999                                |
|                         | <i>P</i> | <b>&lt;0.001</b> | <b>&lt;0.001</b> | <b>&lt;0.001</b> | <b>&lt;0.001</b>     | <b>&lt;0.001</b>                      | <b>&lt;0.001</b>                     | <b>0.016</b>                         | <b>0.013</b>                         |
| <i>Cd</i>               | F        | 2.103            | 0.353            | 5.380            | 10.77                | 54.24                                 | 2.852                                | 5.643                                | 3.567                                |
|                         | <i>P</i> | 0.112            | 0.787            | <b>0.003</b>     | <b>&lt;0.001</b>     | <b>&lt;0.001</b>                      | <b>0.047</b>                         | <b>0.019</b>                         | <b>0.021</b>                         |
| <i>Time</i> × <i>Cd</i> | F        | 2.030            | 5.301            | 3.232            | 9.114                | 7.632                                 | 0.782                                | 30.78                                | 0.416                                |
|                         | <i>P</i> | 0.056            | <b>&lt;0.001</b> | <b>0.004</b>     | <b>&lt;0.001</b>     | <b>&lt;0.001</b>                      | 0.634                                | <b>&lt;0.001</b>                     | 0.920                                |

DO: dissolved oxygen; DOC: dissolved organic carbon; Chl-*a*: chlorophyll *a*.

The data represent the mean ± standard deviation (n = 4); Bold values represent significant influence of *Time*, *Cd*, or *Time* × *Cd* on variables (*P* < 0.05).

**Table S2** Two-way analysis of variance (ANOVA) for alpha-diversity metrics (per 3380 sequences) of bacterioplankton communities across different sampling days and Cd levels.

| Sampling day            | Cd level | Observed richness | Chao1           | Phylogenetic diversity | Shannon           | Pielou's <i>J</i>   |
|-------------------------|----------|-------------------|-----------------|------------------------|-------------------|---------------------|
| 0d                      | Origin   | 600 ± 60          | 1338 ± 191      | 58.1 ± 5.5             | 6.73 ± 0.28       | 0.729 ± 0.019       |
| 1d                      | CK       | 629 ± 53 abc      | 1476 ± 276 bcd  | 59.4 ± 5.1 ab          | 6.79 ± 0.17 abcd  | 0.731 ± 0.012 abcd  |
|                         | Cd1      | 556 ± 59 cde      | 1237 ± 134 cde  | 53.2 ± 5.0 bcde        | 6.43 ± 0.28 cdef  | 0.705 ± 0.021 bcdef |
|                         | Cd2      | 581 ± 53 cde      | 1344 ± 173 cde  | 55.7 ± 4.5 abc         | 6.57 ± 0.33 abcde | 0.715 ± 0.026 abcde |
|                         | Cd3      | 631 ± 142 abc     | 1510 ± 445 bc   | 58.1 ± 11.3 abc        | 7.09 ± 0.47 ab    | 0.764 ± 0.025 a     |
| 4d                      | CK       | 511 ± 70 e        | 1238 ± 211 cde  | 44.3 ± 6.5 f           | 5.61 ± 0.67 h     | 0.623 ± 0.062 hi    |
|                         | Cd1      | 500 ± 78 e        | 1269 ± 210 cde  | 44.3 ± 6.5 f           | 5.46 ± 0.56 h     | 0.610 ± 0.051 i     |
|                         | Cd2      | 689 ± 57 ab       | 1671 ± 207 ab   | 59.8 ± 6.0 ab          | 6.98 ± 0.51 abc   | 0.740 ± 0.047 abc   |
|                         | Cd3      | 722 ± 16 a        | 1855 ± 40 a     | 63.3 ± 2.6 a           | 7.16 ± 0.21 a     | 0.754 ± 0.021 ab    |
| 7d                      | CK       | 613 ± 78 bcd      | 1465 ± 207 bcd  | 54.3 ± 6.6 bcd         | 6.31 ± 0.64 defg  | 0.681 ± 0.056 defg  |
|                         | Cd1      | 566 ± 85 cde      | 1424 ± 394 bcde | 49.8 ± 7.6 cdef        | 6.05 ± 0.63 efgh  | 0.662 ± 0.055 efghi |
|                         | Cd2      | 558 ± 77 cde      | 1405 ± 280 bcde | 50.3 ± 6.8 cdef        | 6.26 ± 0.34 defg  | 0.687 ± 0.023 cdefg |
|                         | Cd3      | 519 ± 21 de       | 1262 ± 39 cde   | 45.4 ± 2.0 ef          | 6.27 ± 0.21 defg  | 0.695 ± 0.020 cdef  |
| 14d                     | CK       | 538 ± 110 cde     | 1134 ± 238 e    | 50.0 ± 7.4 cdef        | 5.92 ± 0.53 fgh   | 0.654 ± 0.041 fghi  |
|                         | Cd1      | 516 ± 36 de       | 1113 ± 130 e    | 45.3 ± 1.9 ef          | 5.78 ± 0.33 gh    | 0.641 ± 0.034 ghi   |
|                         | Cd2      | 504 ± 29 e        | 1156 ± 93 de    | 46.8 ± 1.8 def         | 6.02 ± 0.37 efgh  | 0.670 ± 0.042 efgh  |
|                         | Cd3      | 556 ± 34 cde      | 1342 ± 132 cde  | 49.8 ± 2.9 cdef        | 6.49 ± 0.26 bcdef | 0.712 ± 0.023 abcde |
| <i>Time</i>             | F        | 4.111             | 5.504           | 6.561                  | 6.683             | 7.682               |
|                         | <i>P</i> | <b>0.011</b>      | <b>0.003</b>    | <b>0.001</b>           | <b>0.001</b>      | <b>&lt; 0.001</b>   |
| <i>Cd</i>               | F        | 2.955             | 2.984           | 3.245                  | 10.67             | 12.79               |
|                         | <i>P</i> | <b>0.042</b>      | <b>0.040</b>    | <b>0.030</b>           | <b>&lt; 0.001</b> | <b>&lt; 0.001</b>   |
| <i>Time</i> × <i>Cd</i> | F        | 3.578             | 2.257           | 3.885                  | 3.256             | 2.720               |
|                         | <i>P</i> | <b>0.002</b>      | <b>0.034</b>    | <b>0.001</b>           | <b>0.004</b>      | <b>0.012</b>        |

The data represent the mean ± standard deviation (n = 4); Different lowercase letters in the same column indicate significant differences at 0.05 level (based on LSD); Bold values represent significant influence of *Time*, *Cd*, or *Time* × *Cd* on metrics (*P* < 0.05).

**Table S3** Pearson's correlation coefficients (*r*) between Cd level and relative abundances of top phylotypes primarily driving bacterial community variation caused by Cd addition at each sampling day (*n* = 16). Only the OTUs with significant coefficients are listed. Contribution: percentages of the phylotypes contributing to the overall dissimilarity along the Cd gradient at each time point calculated by similarity percentage (SIMPER) analysis. Taxonomy of the OTUs was identified in Greengenes database.

| OTU ID   | Taxa                                                                                         | <i>r</i> | <i>P</i> | Contribution % |
|----------|----------------------------------------------------------------------------------------------|----------|----------|----------------|
| 1d       |                                                                                              |          |          |                |
| OTU3983  | p_Bacteroidetes; c_Flavobacteria; o_Flavobacteriales; f_Flavobacteriaceae; g_Unclassified    | 0.971    | < 0.001  | 2.84           |
| OTU10908 | p_Bacteroidetes; c_Flavobacteria; o_Flavobacteriales; f_Flavobacteriaceae; g_Tenacibaculum   | 0.837    | < 0.001  | 0.98           |
| OTU6594  | p_Bacteroidetes; c_Flavobacteria; o_Flavobacteriales; f_Flavobacteriaceae; g_Winogradskyella | 0.799    | < 0.001  | 0.72           |
| OTU9866  | p_Bacteroidetes; c_Flavobacteria; o_Flavobacteriales; f_Flavobacteriaceae; g_Unclassified    | 0.832    | < 0.001  | 0.71           |
| OTU11304 | p_Bacteroidetes; c_Flavobacteria; o_Flavobacteriales; f_Flavobacteriaceae; g_Polaribacter    | 0.883    | < 0.001  | 0.70           |
| OTU12733 | c_Alphaproteobacteria; o_Rhodobacterales; f_Rhodobacteraceae; g_Octadecabacter               | 0.544    | 0.029    | 0.85           |
| OTU4372  | c_Alphaproteobacteria; o_Rhodobacterales; f_Rhodobacteraceae; g_Pseudoruegeria               | 0.517    | 0.040    | 0.78           |
| OTU11417 | p_Bacteroidetes; c_Flavobacteria; o_Flavobacteriales; f_Flavobacteriaceae; g_Unclassified    | -0.564   | 0.023    | 7.08           |
| OTU3859  | p_Bacteroidetes; c_Flavobacteria; o_Flavobacteriales; f_Flavobacteriaceae; g_Unclassified    | -0.666   | 0.005    | 4.21           |
| OTU6529  | p_Bacteroidetes; c_Unclassified                                                              | -0.676   | 0.004    | 1.60           |
| OTU5995  | p_Bacteroidetes; c_Sphingobacteria; o_Sphingobacteriales; f_Unclassified                     | -0.927   | < 0.001  | 1.12           |
| OTU551   | p_Bacteroidetes; c_Sphingobacteria; o_Sphingobacteriales; f_Unclassified                     | -0.733   | 0.001    | 0.71           |
| 4d       |                                                                                              |          |          |                |
| OTU8594  | p_Bacteroidetes; c_Flavobacteria; o_Flavobacteriales; f_Flavobacteriaceae; g_Sediminicola    | 0.810    | < 0.001  | 2.56           |
| OTU6594  | p_Bacteroidetes; c_Flavobacteria; o_Flavobacteriales; f_Flavobacteriaceae; g_Winogradskyella | 0.682    | 0.004    | 0.91           |
| OTU9866  | p_Bacteroidetes; c_Flavobacteria; o_Flavobacteriales; f_Flavobacteriaceae; g_Unclassified    | 0.872    | < 0.001  | 0.73           |
| OTU7500  | c_Alphaproteobacteria; o_Rickettsiales; f_Pelagibacteraceae; g_Unclassified                  | 0.766    | 0.001    | 1.95           |
| OTU6182  | c_Alphaproteobacteria; o_Sphingomonadales; f_Erythrobacteraceae; g_Unclassified              | 0.524    | 0.037    | 0.78           |
| OTU4028  | c_Alphaproteobacteria; o_Sphingomonadales; f_Erythrobacteraceae; g_Unclassified              | 0.808    | < 0.001  | 0.71           |
| OTU11469 | c_Gammaproteobacteria; o_Thiotrichales; f_Piscirickettsiaceae; g_Unclassified                | 0.695    | 0.003    | 0.85           |
| OTU10579 | c_Alphaproteobacteria; o_Rhodobacterales; f_Rhodobacteraceae; g_Phaeobacter                  | -0.865   | < 0.001  | 4.19           |
| OTU3392  | c_Alphaproteobacteria; o_Rhodobacterales; f_Rhodobacteraceae; g_Anaerospora                  | -0.672   | 0.004    | 2.32           |
| OTU11689 | c_Alphaproteobacteria; o_Rhodobacterales; f_Rhodobacteraceae; g_Unclassified                 | -0.515   | 0.041    | 0.84           |

7d

|          |                                                                                              |        |         |      |
|----------|----------------------------------------------------------------------------------------------|--------|---------|------|
| OTU3983  | p_Bacteroidetes; c_Flavobacteria; o_Flavobacteriales; f_Flavobacteriaceae; g_Unclassified    | 0.798  | < 0.001 | 5.67 |
| OTU6594  | p_Bacteroidetes; c_Flavobacteria; o_Flavobacteriales; f_Flavobacteriaceae; g_Winogradskyella | 0.880  | < 0.001 | 1.99 |
| OTU9148  | p_Bacteroidetes; c_Flavobacteria; o_Flavobacteriales; f_Flavobacteriaceae; g_Algibacter      | 0.932  | < 0.001 | 0.78 |
| OTU8594  | p_Bacteroidetes; c_Flavobacteria; o_Flavobacteriales; f_Flavobacteriaceae; g_Sediminicola    | 0.943  | < 0.001 | 0.76 |
| OTU6182  | c_Alphaproteobacteria; o_Sphingomonadales; f_Erythrobacteraceae; g_Unclassified              | 0.753  | 0.001   | 1.79 |
| OTU4028  | c_Alphaproteobacteria; o_Sphingomonadales; f_Erythrobacteraceae; g_Unclassified              | 0.955  | < 0.001 | 1.77 |
| OTU4372  | c_Alphaproteobacteria; o_Rhodobacterales; f_Rhodobacteraceae; g_Pseudoruegeria               | 0.797  | < 0.001 | 0.90 |
| OTU9175  | c_Gammaproteobacteria; o_Alteromonadales; f_Alteromonadaceae; g_Glaciecola                   | 0.850  | < 0.001 | 1.36 |
| OTU11469 | c_Gammaproteobacteria; o_Thiotrichales; f_Piscirickettsiaceae; g_Unclassified                | 0.705  | 0.002   | 0.93 |
| OTU8528  | p_Bacteroidetes; c_Sphingobacteria; o_Sphingobacteriales; f_Saprospiraceae; g_Unclassified   | -0.513 | 0.042   | 0.80 |
| OTU3392  | c_Alphaproteobacteria; o_Rhodobacterales; f_Rhodobacteraceae; g_Anaerospira                  | -0.645 | 0.007   | 4.32 |
| OTU10579 | c_Alphaproteobacteria; o_Rhodobacterales; f_Rhodobacteraceae; g_Phaeobacter                  | -0.796 | < 0.001 | 2.18 |

14d

|         |                                                                                              |        |         |       |
|---------|----------------------------------------------------------------------------------------------|--------|---------|-------|
| OTU8594 | p_Bacteroidetes; c_Flavobacteria; o_Flavobacteriales; f_Flavobacteriaceae; g_Sediminicola    | 0.823  | < 0.001 | 5.79  |
| OTU6594 | p_Bacteroidetes; c_Flavobacteria; o_Flavobacteriales; f_Flavobacteriaceae; g_Winogradskyella | 0.910  | < 0.001 | 1.32  |
| OTU4028 | c_Alphaproteobacteria; o_Sphingomonadales; f_Erythrobacteraceae; g_Unclassified              | 0.612  | 0.012   | 1.82  |
| OTU2109 | p_Bacteroidetes; c_Flavobacteria; o_Flavobacteriales; f_Flavobacteriaceae; g_Unclassified    | -0.727 | 0.001   | 11.63 |
| OTU8528 | p_Bacteroidetes; c_Sphingobacteria; o_Sphingobacteriales; f_Saprospiraceae; g_Unclassified   | -0.589 | 0.016   | 0.79  |
| OTU4834 | c_Alphaproteobacteria; o_Rhodobacterales; f_Rhodobacteraceae; g_Dinoroseobacter              | -0.579 | 0.019   | 2.08  |

---

**Table S4** Closest matched type strains of the representative phylotypes associated with Cd level based on 16S rRNA gene in EzTaxon database.

| OTU ID         | Length<br>(bp) | Closest match                                             | Similarity<br>(%) | Accession    | Taxonomy                                                                                |
|----------------|----------------|-----------------------------------------------------------|-------------------|--------------|-----------------------------------------------------------------------------------------|
| Positive group |                |                                                           |                   |              |                                                                                         |
| OTU3983        | 388            | <i>Polaribacter porphyrae</i> LNM-20 <sup>T</sup>         | <b>98.97</b>      | AB695286     | Bacteroidetes; Flavobacteria; Flavobacteriales; Flavobacteriaceae; Polaribacter         |
| OTU10908       | 419            | <i>Tenacibaculum adriaticum</i> B390 <sup>T</sup>         | 95.7              | AM412314     | Bacteroidetes; Flavobacteria; Flavobacteriales; Flavobacteriaceae; Tenacibaculum        |
| OTU6594        | 390            | <i>Winogradskyella litorisediminis</i> DPS-8 <sup>T</sup> | <b>100</b>        | JQ432561     | Bacteroidetes; Flavobacteria; Flavobacteriales; Flavobacteriaceae; Winogradskyella      |
| OTU9866        | 421            | <i>Dokdonia diaphoros</i> MSKK-32 <sup>T</sup>            | 94.54             | AB198089     | Bacteroidetes; Flavobacteria; Flavobacteriales; Flavobacteriaceae; Dokdonia             |
| OTU11304       | 388            | <i>Polaribacter reichenbachii</i> 6Alg 8 <sup>T</sup>     | <b>99.74</b>      | HQ891656     | Bacteroidetes; Flavobacteria; Flavobacteriales; Flavobacteriaceae; Polaribacter         |
| OTU8594        | 393            | <i>Maribacter antarcticus</i> CL-AP4 <sup>T</sup>         | 94.4              | EU512921     | Bacteroidetes; Flavobacteria; Flavobacteriales; Flavobacteriaceae; Maribacter           |
| OTU9148        | 388            | <i>Algibacter aestuarii</i> KYW371 <sup>T</sup>           | <b>100</b>        | HQ405792     | Bacteroidetes; Flavobacteria; Flavobacteriales; Flavobacteriaceae; Algibacter           |
| OTU12733       | 423            | <i>Planktomarina temperata</i> RCA23 <sup>T</sup>         | 95.74             | GQ369962     | Alphaproteobacteria; Rhodobacterales; Rhodobacteraceae; Planktomarina                   |
| OTU4372        | 423            | <i>Lentibacter algarum</i> ZX100 <sup>T</sup>             | 96.22             | FJ436732     | Alphaproteobacteria; Rhodobacterales; Rhodobacteraceae; Lentibacter                     |
| OTU7500        | 388            | <i>Candidatus Pelagibacter ubique</i> HTCC1062            | <b>99.48</b>      | CP000084     | Alphaproteobacteria; SAR11; SAR11-1; Pelagibacter                                       |
| OTU6182        | 393            | <i>Altererythrobacter namhicola</i> KYW48 <sup>T</sup>    | <b>97.96</b>      | FJ935793     | Alphaproteobacteria; Sphingomonadales; Erythrobacteraceae; Altererythrobacter           |
| OTU4028        | 393            | <i>Erythrobacter seohaensis</i> SW-135 <sup>T</sup>       | <b>97.46</b>      | AY562219     | Alphaproteobacteria; Sphingomonadales; Erythrobacteraceae; Erythrobacter                |
| OTU11469       | 393            | <i>Methylophaga marina</i> DSM 5689 <sup>T</sup>          | 96.95             | X95459       | Gammaproteobacteria; Thiotrichales; Methylophaga; Methylophaga                          |
| OTU9175        | 393            | <i>Aliiglaciecola lipolytica</i> E3 <sup>T</sup>          | <b>100</b>        | EU183316     | Gammaproteobacteria; Alteromonadales; Alteromonadaceae; Aliiglaciecola                  |
| Negative group |                |                                                           |                   |              |                                                                                         |
| OTU11417       | 421            | <i>Corallibacter vietnamensis</i> KMM 6217 <sup>T</sup>   | 94.54             | HQ257254     | Bacteroidetes; Flavobacteria; Flavobacteriales; Flavobacteriaceae; Meridianimaribacter  |
| OTU3859        | 417            | <i>Marinitalea sucinacia</i> JC2131 <sup>T</sup>          | 95.68             | FJ387163     | Bacteroidetes; Flavobacteria; Flavobacteriales; Flavobacteriaceae; Marinitalea          |
| OTU6529        | 421            | <i>Owenweeksia hongkongensis</i> DSM 17368 <sup>T</sup>   | 87.17             | CP003156     | Bacteroidetes; Flavobacteria; Flavobacteriales; Cryomorphaceae; Owenweeksia             |
| OTU5995        | 421            | <i>Mucilagibacter herbaticus</i> DR-9 <sup>T</sup>        | 85.51             | JN695632     | Bacteroidetes; Sphingobacteria; Sphingobacteriales; Sphingobacteriaceae; Mucilagibacter |
| OTU551         | 422            | <i>Solitalea koreensis</i> R2A36-4 <sup>T</sup>           | 85.04             | EU787448     | Bacteroidetes; Sphingobacteria; Sphingobacteriales; Sphingobacteriaceae; Solitalea      |
| OTU8528        | 382            | <i>Lewinella nigricans</i> NBRC 102662 <sup>T</sup>       | 90.31             | AB301615     | Bacteroidetes; Sphingobacteria; Sphingobacteriales; Saprospiraceae; Lewinella           |
| OTU2109        | 390            | <i>Kordia antarctica</i> IMCC3317 <sup>T</sup>            | <b>97.44</b>      | JX456458     | Bacteroidetes; Flavobacteria; Flavobacteriales; Flavobacteriaceae; Kordia               |
| OTU10579       | 392            | <i>Phaeobacter arcticus</i> DSM 23566 <sup>T</sup>        | <b>99.23</b>      | AXBF01000003 | Alphaproteobacteria; Rhodobacterales; Rhodobacteraceae; Phaeobacter                     |
| OTU3392        | 392            | <i>Roseovarius litoreus</i> GSW-M15 <sup>T</sup>          | <b>99.49</b>      | JQ390520     | Alphaproteobacteria; Rhodobacterales; Rhodobacteraceae; Roseovarius                     |
| OTU11689       | 392            | <i>Tropicibacter phthalicicus</i> KU27E1 <sup>T</sup>     | <b>99.23</b>      | AB636139     | Alphaproteobacteria; Rhodobacterales; Rhodobacteraceae; Tropicibacter                   |
| OTU4834        | 392            | <i>Pseudoruegeria lutimaris</i> HD-43 <sup>T</sup>        | <b>98.47</b>      | FJ374173     | Alphaproteobacteria; Rhodobacterales; Rhodobacteraceae; Pseudoruegeria                  |

Bold values represent similarity > 97%

**Figure S1** Average relative abundances of the dominant bacterial phyla (> 1%) in seawater samples across different sampling days and Cd levels (n = 4). Relative abundances are based on the proportional frequencies of those DNA sequences that could be classified at phylum level except Proteobacteria, which were grouped at class level. Unclassified means that the taxa cannot be assigned to any known phylum in the current Greengenes database.

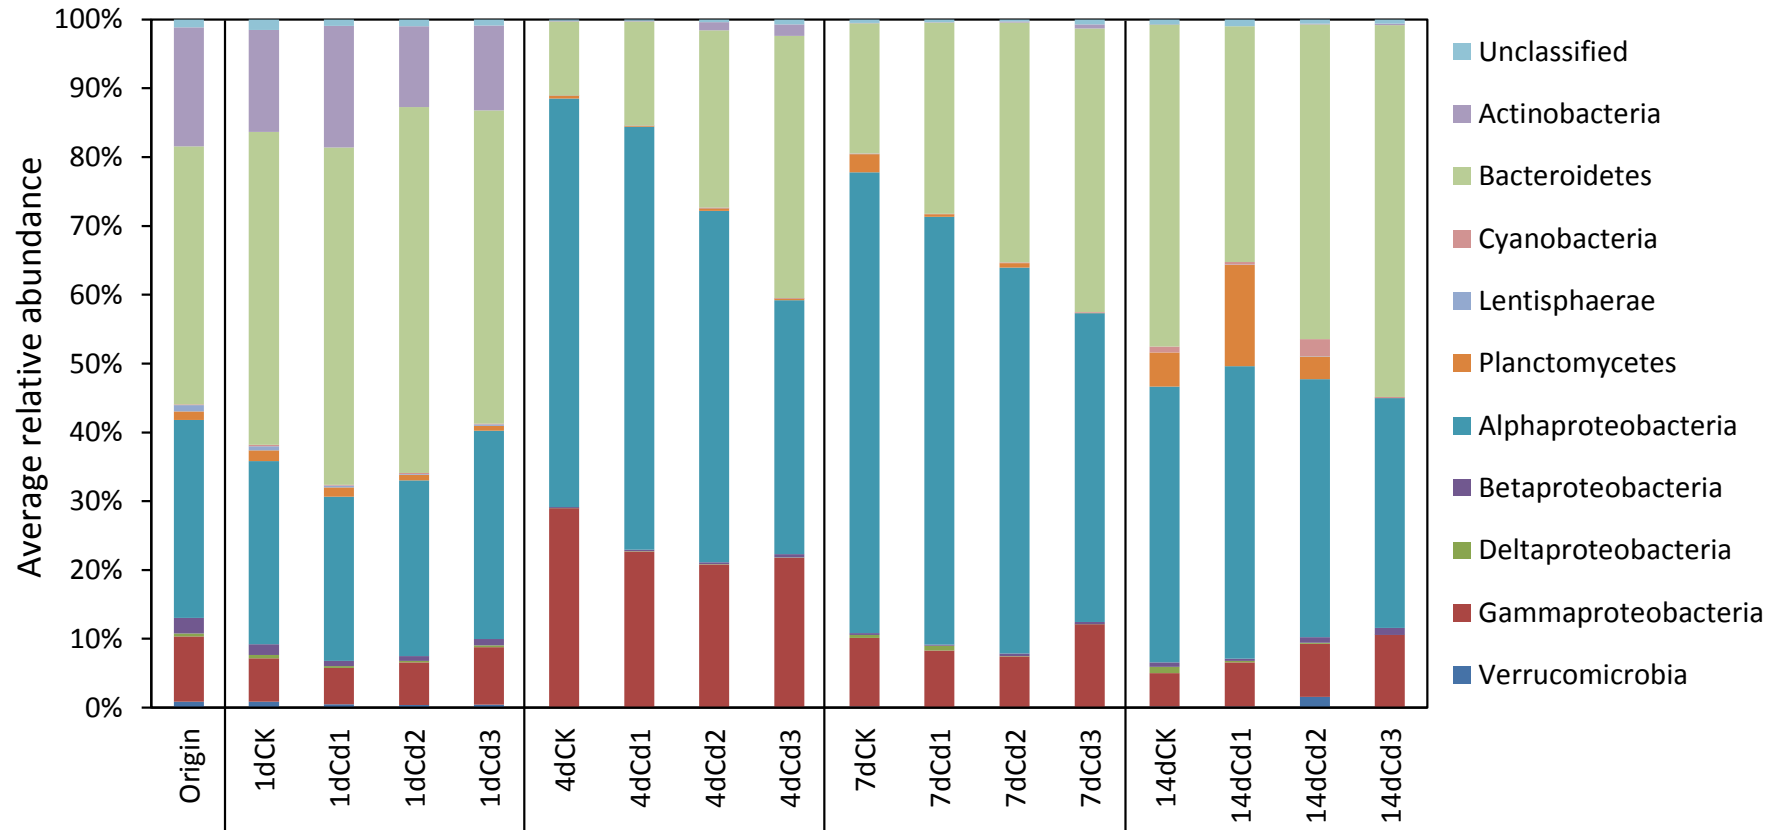

**Figure S2** Mean ( $\pm$  standard error) unweighted UniFrac distance (**Upper**) and Bray-Curtis dissimilarity (**Bottom**) between communities of parallel samples within each Cd level and samples among the different Cd levels. At each time point,  $P < 0.01$  unless indicated (Student  $t$ -tests, ns: not significant).

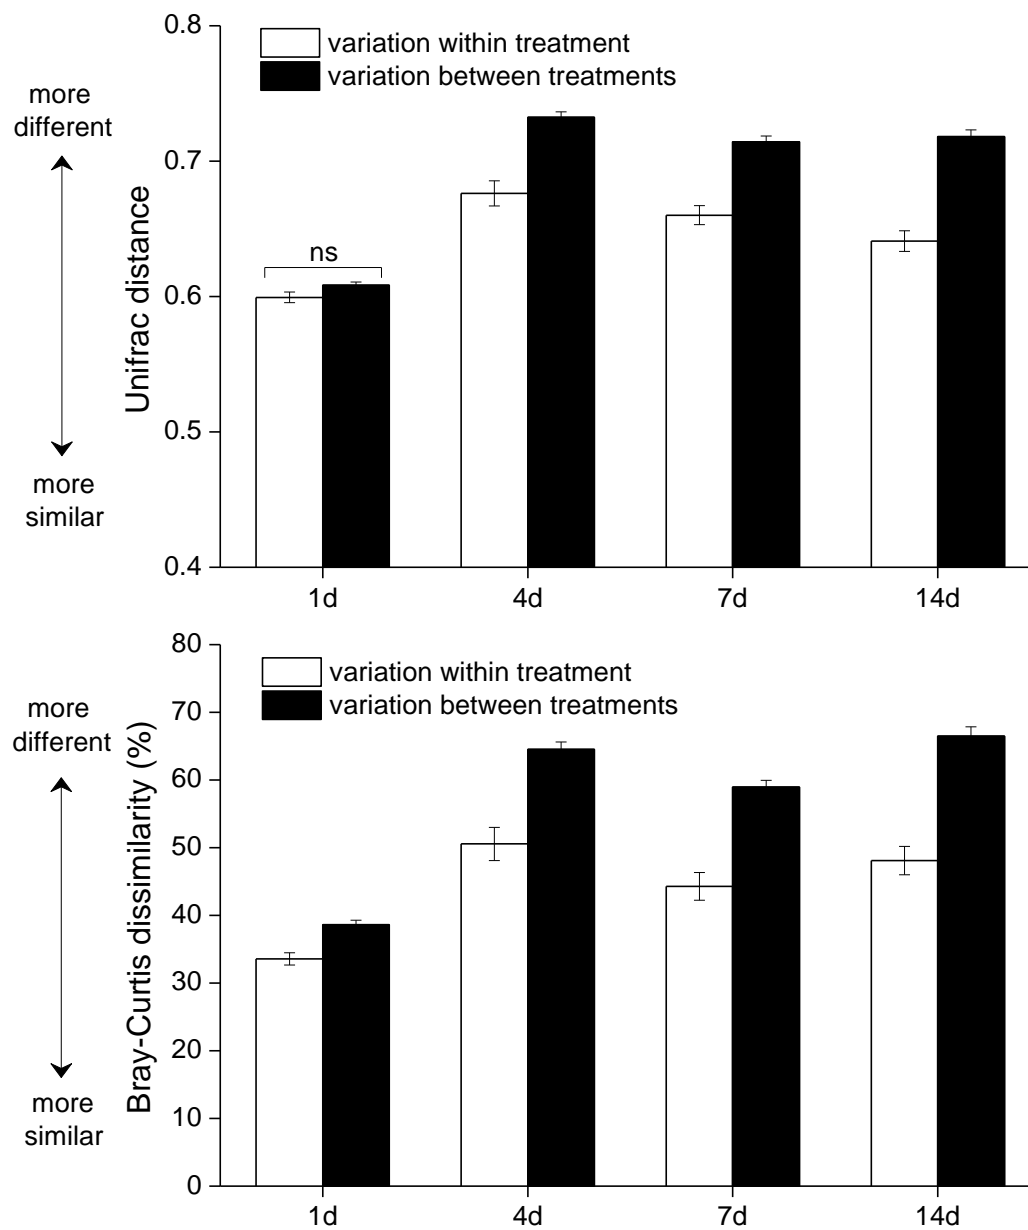

Supplement: AEM.02562-14_zam999105900so1.pdf [file AEM.02562-14_zam999105900so1.pdf]
